# Supplementary material for: Development and Validation of a Machine Learning-Based Nomogram for Prediction of Ankylosing Spondylitis
Source: PubMed Central journal article supplement — Rheumatol Ther. 2022 Aug 6;9(5):1377–97. doi: 10.1007/s40744-022-00481-6 (PMC9510083; doi:10.1007/s40744-022-00481-6), 2022-08-06

## SUPPLEMENTARY MATERIAL 2

### **Development and validation of a machine learning-based nomogram for prediction of ankylosing spondylitis**

Jichong Zhu<sup>1</sup>, Qing Lu<sup>2</sup>, Tuo Liang<sup>1</sup>, JieJiang<sup>1</sup>, Hao Li<sup>1</sup>, Chenxin Zhou<sup>1</sup>, Shaofeng Wu<sup>1</sup>, Tianyou Chen<sup>1</sup>, Jiarui Chen<sup>1</sup>, Guobing Deng<sup>1</sup>, Yuanlin Yao<sup>1</sup>, Shian Liao<sup>1</sup>, Chaojie Yu<sup>1</sup>, Shengsheng Huang<sup>1</sup>, Xuhua Sun<sup>1</sup>, Liyi Chen<sup>1</sup>, Wenkang Chen<sup>1</sup>, Zhen Ye<sup>1</sup>, Hao Guo<sup>1</sup>, Wuhua Chen<sup>1</sup>, Wenyong Jiang<sup>1</sup>, Binguang Fan<sup>1</sup>, Xiang Tao<sup>1</sup>, Xinli Zhan<sup>1\*</sup>, Chong Liu<sup>1\*</sup>

1. The First Affiliated Hospital of Guangxi Medical University, Nanning, 530021, P. R. China.

2. The First Affiliated Hospital of Guangxi University of Science and Technology, Liuzhou, 540000, P. R. China.

\* Correspondence to Dr. Chong Liu, Doctor Degree, E-mail: [liuchong@stu.gxmu.edu.cn](mailto:liuchong@stu.gxmu.edu.cn)

\* Correspondence to Dr. Xinli Zhan, Doctor Degree, E-mail: [zhanxinli@stu.gxmu.edu.cn](mailto:zhanxinli@stu.gxmu.edu.cn)

**Supplementary Figure 1.** LASSO regression results for all variables.

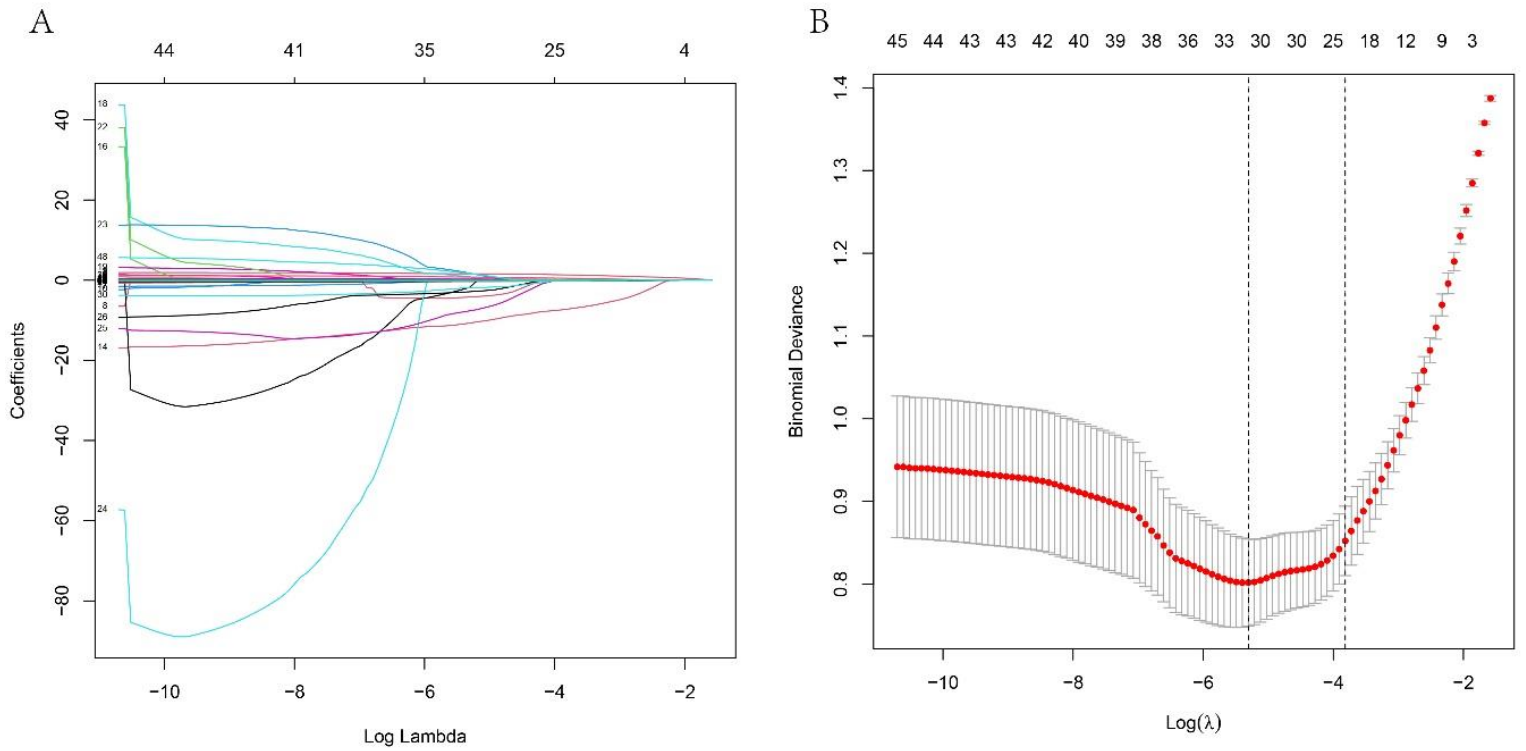

**Supplementary Figure 2. Random forest results for all variables.**

A

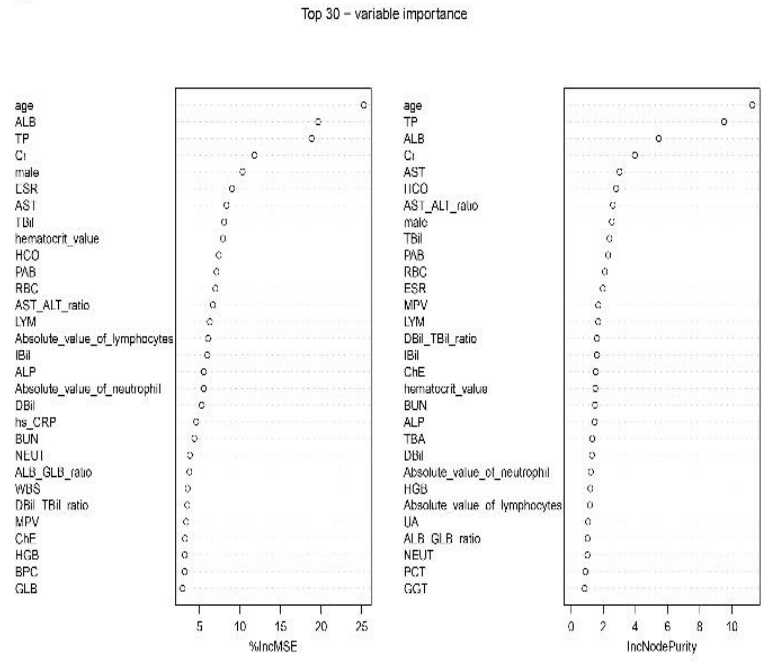

B

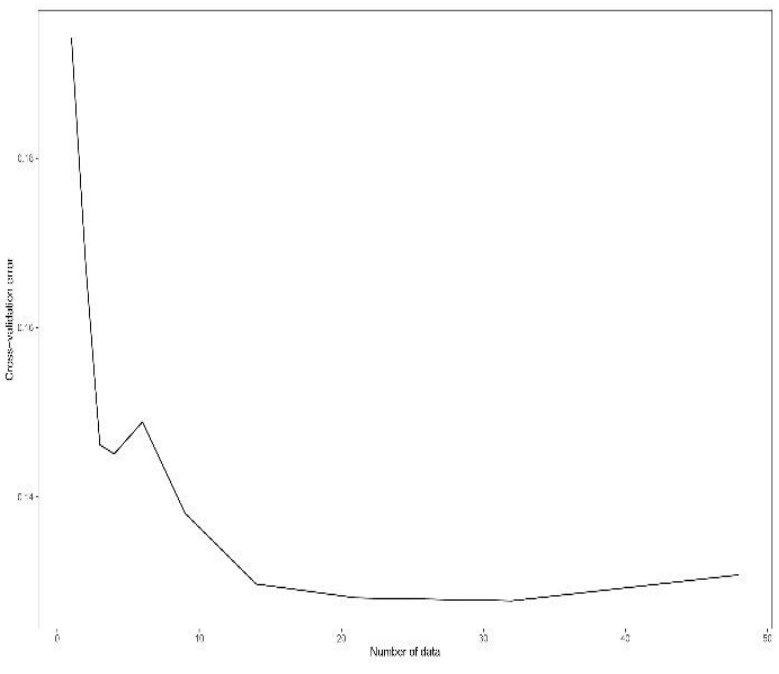

Supplement: 40744_2022_481_MOESM2_ESM.pdf [file 40744_2022_481_MOESM2_ESM.pdf]
